# Supplementary material for: Cyclometallation and NN bond cleavage of 2-(arylazo)phenols by osmium. Synthesis, structure and redox properties †
Source: Royal Society of Chemistry journal article supplement (doi:10.1039/b007486l), 2001-01-01
Supplement: b007486l.doc [file b007486l.doc]

**Table 1.** Microanalytical data of the [Os(PPh3)2(ap-R)Br] complexes

______________________________________________________________________________

Compound Microanalytical dataa

%C %H %N

______________________________________________________________________________

[Os(PPh3)2(ap-OCH3)Br] 57.95 4.09 2.67

(58.03) (4.06) (2.70)

[Os(PPh3)2(ap-CH3)Br] 58.88 4.09 2.70

(58.94) (4.12) (2.75)

[Os(PPh3)2(ap-H)Br] 58.50 3.92 2.75

(58.56) (3.98) (2.79)

[Os(PPh3)2(ap-Cl)Br] 56.64 3.71 2.70

(56.62) (3.75) (2.69)

[Os(PPh3)2(ap-NO2)Br] 55.99 3.73 3.98

(56.05) (3.72) (4.00)

_____________________________________________________________________________

a Calculated values are within parentheses.

**Table 2.** ESR g-valuesa of the [Os(PPh3)2(ap-R)Br] complexes

| _______________________________________________________________________ | | | | | | | |
| --- | --- | --- | --- | --- | --- | --- | --- |
| Compound | g1 | g2 |  |  |  |  |  |
| _______________________________________________________________________ | | | | | | | |
|  |  |  |  |  |  |  |  |
| [Os(PPh3)2(ap-OCH3)Br] | 2.573 | 1.977 |  |  |  |  |  |
|  |  |  |  |  |  |  |  |
|  |  |  |  |  |  |  |  |
| [Os(PPh3)2(ap-CH3)Br] | 2.594 | 1.958 |  |  |  |  |  |
|  |  |  |  |  |  |  |  |
|  |  |  |  |  |  |  |  |
| [Os(PPh3)2(ap-H)Br] | 2.629 | 1.992 |  |  |  |  |  |
|  |  |  |  |  |  |  |  |
|  |  |  |  |  |  |  |  |
| [Os(PPh3)2(ap-Cl)Br] | 2.598 | 1.962 |  |  |  |  |  |
|  |  |  |  |  |  |  |  |
|  |  |  |  |  |  |  |  |
| [Os(PPh3)2(ap-NO2)Br] | 2.631 | 1.984 |  |  |  |  |  |
|  |  |  |  |  |  |  |  |
| _______________________________________________________________________ | | | | | | | |

a In 1:1 dichloromethane-toluene solution at 77 K.

**Table 3.**  Microanalytical data of the [Os(PPh3)(ap-R)(N-O)] complexes

______________________________________________________________________________

Compound Microanalytical dataa

%C %H %N

______________________________________________________________________________

[Os(PPh3)(ap-OCH3)(N-O)] 57.53 4.16 5.14

(57.56) (4.18) (5.17)

[Os(PPh3)(ap-CH3) (N-O)] 58.70 4.24 5.23

(58.72) (4.26) (5.27)

[Os(PPh3)(ap-H) (N-O)] 58.22 4.07 5.35

(58.24) (4.09) (5.36)

[Os(PPh3)(ap-Cl) (N-O)] 55.71 3.75 5.13

(55.77) (3.79) (5.14)

[Os(PPh3)(ap-NO2) (N-O)] 55.09 3.76 6.72

(55.07) (3.74) (6.76)

_____________________________________________________________________________

a Calculated values are within parentheses.
